# Supplementary material
Source: PubMed Central journal article supplement (PMC4270407)
Supplement: ac5035314_si_001.pdf [file ac5035314_si_001.pdf]

## Improvement of Shotgun Proteomics in the Negative Mode by Carbamylation of Peptides and Ultraviolet Photodissociation Mass Spectrometry

Sylvester M. Greer, Joe R. Cannon, Jennifer S. Brodbelt\*

Department of Chemistry, University of Texas at Austin, Austin, TX

**Supporting Figure 1.** pI distribution of *in silico* generated tryptic peptides from *H. sapiens*, *E.coli*, and *S. cerevisiae* with up to two missed cleavages. Significant portions (52-58%) of these tryptic peptidomes are acidic.

**Supporting Figure 2.** Reaction scheme for carbamylation of a peptide bearing a lysine residue

**Supporting Figure 3.** Positive mode extracted ion chromatograms of carbamylated and unmodified LVNELTEFAK<sup>2+</sup>, thus showing the extent of carbamylation of *H. salinarum* tryptic peptides.

**Supporting Figure 4.** Positive mode ESI spectrum of RPKPQQFFGLM (M<sub>r</sub> 1347.72 Da) after carbamylation. The major species observed is doubly carbamylated (N-terminus and K), corresponding to a doubly carbamylated species (M<sub>r</sub> 1433.72 Da).

**Supporting Figure 5.** pI distribution of *in silico* generated tryptic peptides from *H. salinarum* with up to two missed cleavages.

**Supporting Figure 6.** Distribution of ion types resulting from UVPD of carbamylated and unmodified tryptic peptide anions from *H. salinarum*

**Supporting Figure 7.** Mass distribution of peptides identified uniquely in the carbamylated peptide data set (light bars) and peptides identified uniquely in the unmodified peptide data set (dark bars) for UVPD of a tryptic digest of *H. salinarum*.

**Supporting Figure 8.** Number of peptides identified uniquely in the unmodified data set sorted by elution time for a tryptic digest of *H. salinarum*.

**Supporting Table 1.** List of carbamylated BSA peptides and the chromatographic peak areas of the carbamylated peptide and its corresponding unmodified peptide. For the case of multiple (double and triple) carbamylations, each sequential modification is shown. CARB indicates the peptide modification at the N-terminus, and CARB(K) indicates the modification at the lysine side-chain.

Distribution of *H. sapiens* tryptic peptides by pI

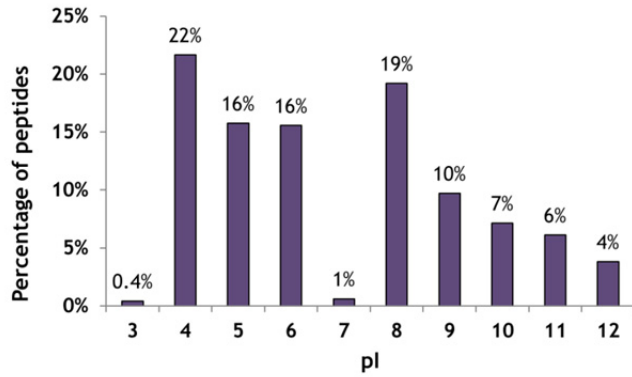

Distribution of *E. coli* tryptic peptides by pI

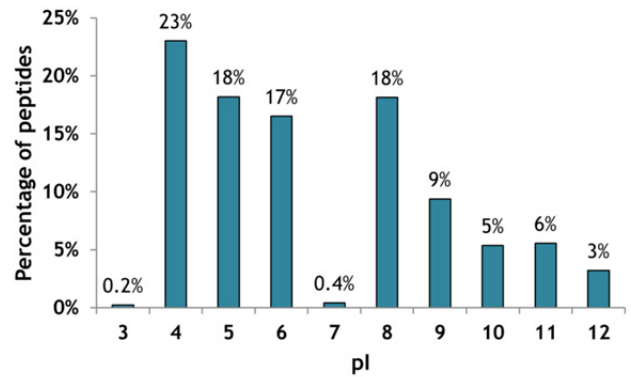

Distribution of *S. cerevisiae* tryptic peptides by pI

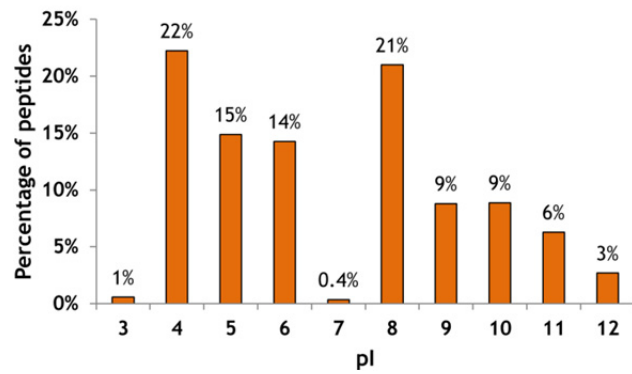

Supporting Figure 1. pI distribution of *in silico* generated tryptic peptides from *H. sapiens*, *E.coli*, and *S. cerevisiae* with up to two missed cleavages. Significant portions (52-58%) of these tryptic peptidomes are acidic.

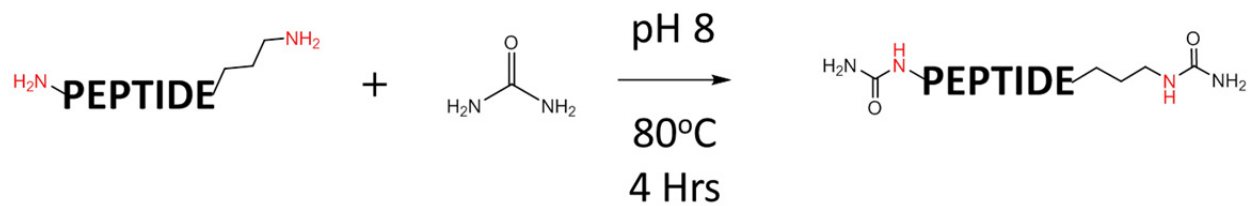

Supporting Figure 2. Reaction scheme for carbamylation of a peptide bearing a lysine residue

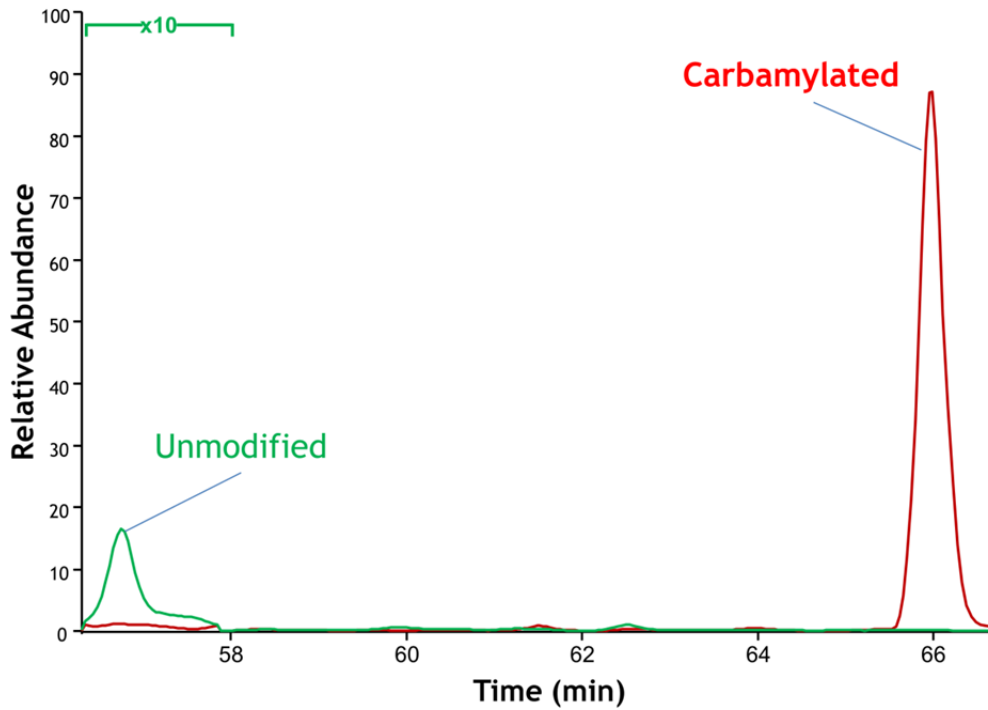

Supporting Figure 3. Positive mode extracted ion chromatograms of carbamylated and unmodified LVNELTEFAK<sup>2+</sup>, thus showing the extent of carbamylation of *H. salinarum* tryptic peptides.

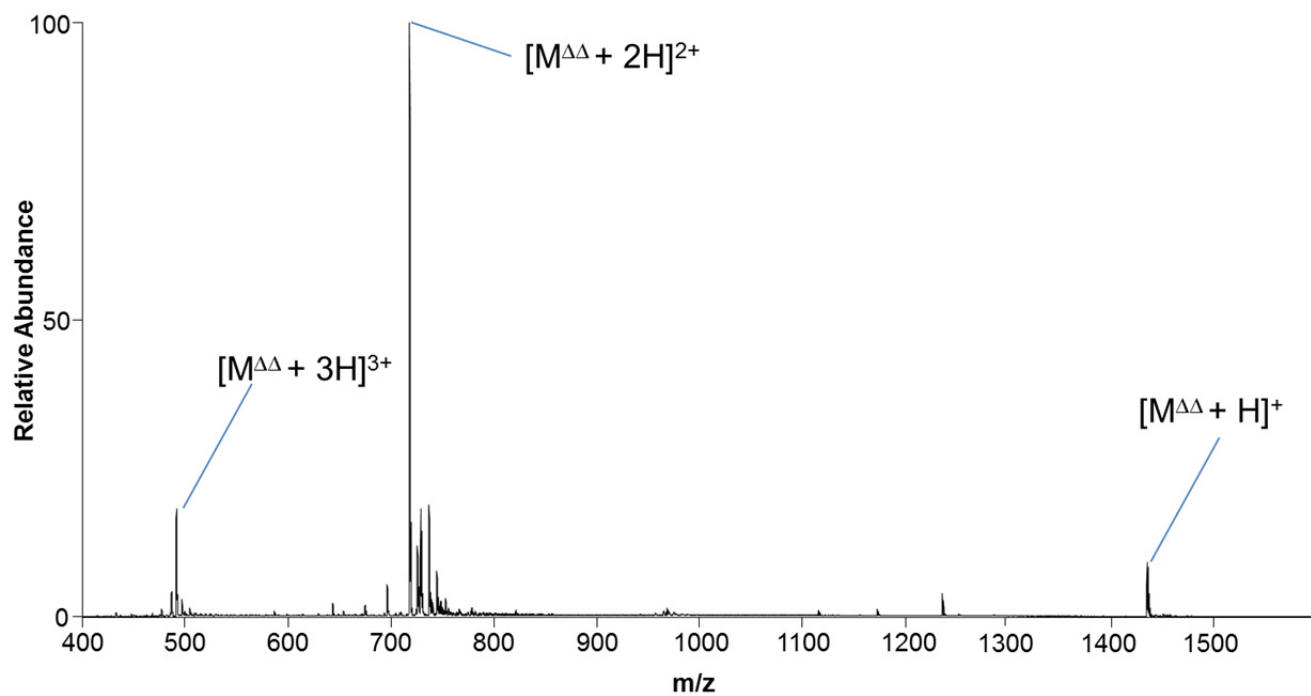

Supporting Figure 4. Positive mode ESI spectrum of RPKPQQFFGLM ( $M_r$  1347.72 Da) after carbamylation. The major species observed is doubly modified (N-terminus and K), corresponding to a doubly carbamylated species ( $M_r$  1433.72 Da).

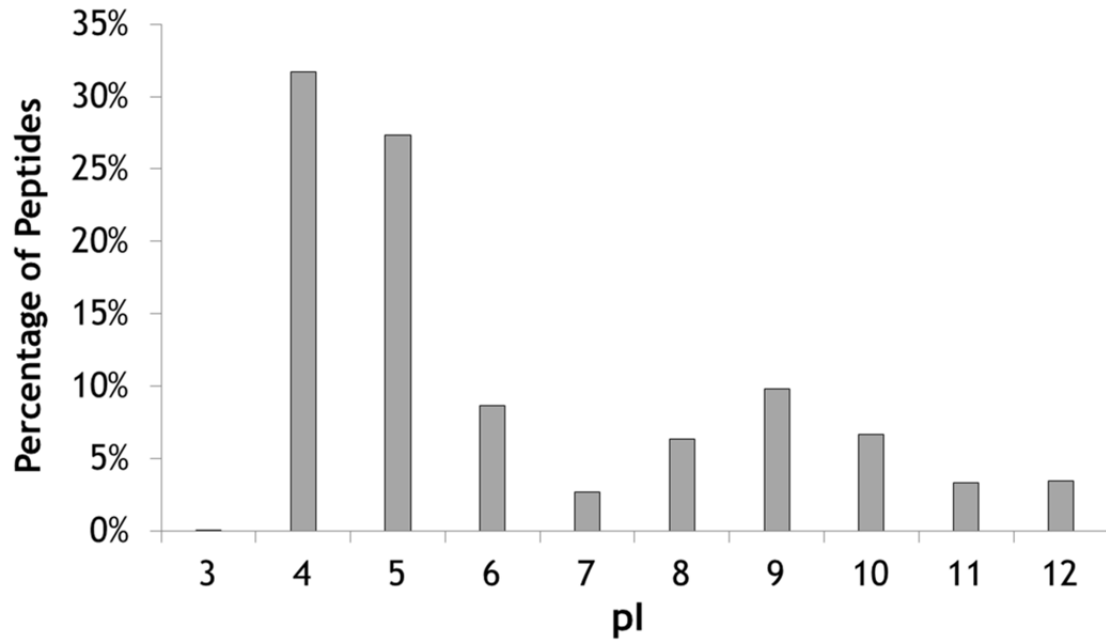

Supporting Figure 5. pI distribution of *in silico* generated tryptic peptides from *H. salinarum* with up to two missed cleavages.

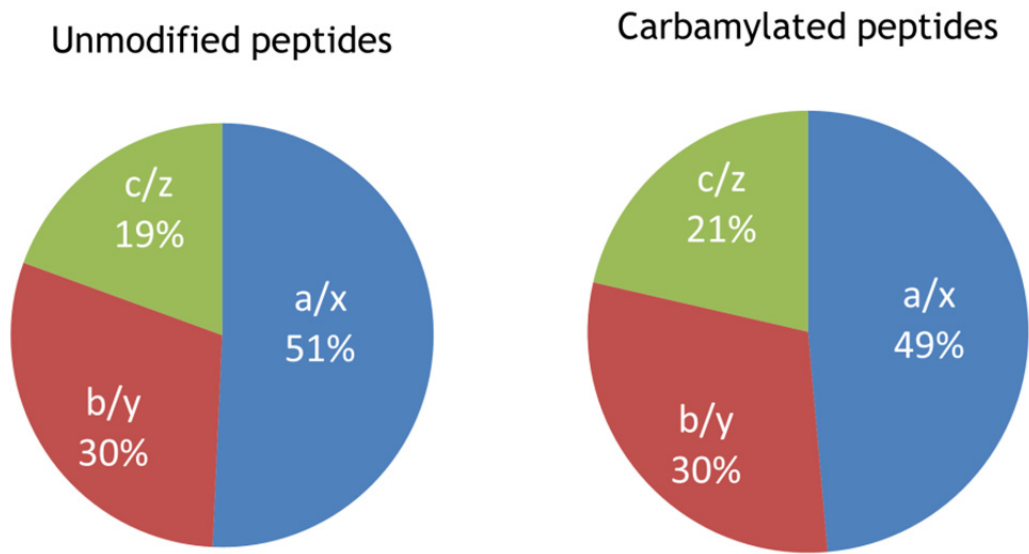

Supporting Figure 6. Distribution of ion types resulting from UVPD of unmodified and carbamylated tryptic peptide anions from *H. salinarum*

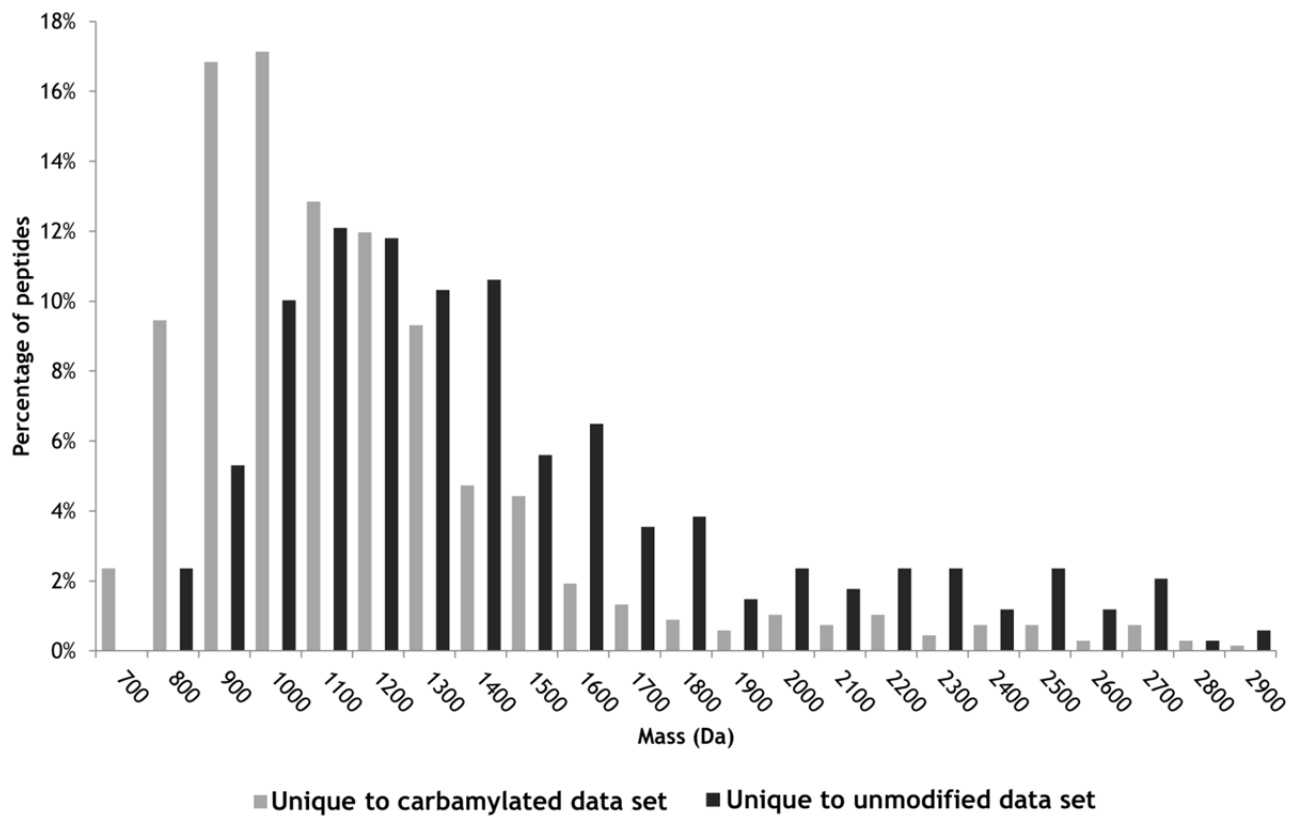

**Supporting Figure 7.** Mass distribution of peptides identified uniquely in the carbamylated peptide data set (light bars) and peptides identified uniquely in the unmodified peptide data set (dark bars) for UVPD of a tryptic digest of *H. salinarum*.



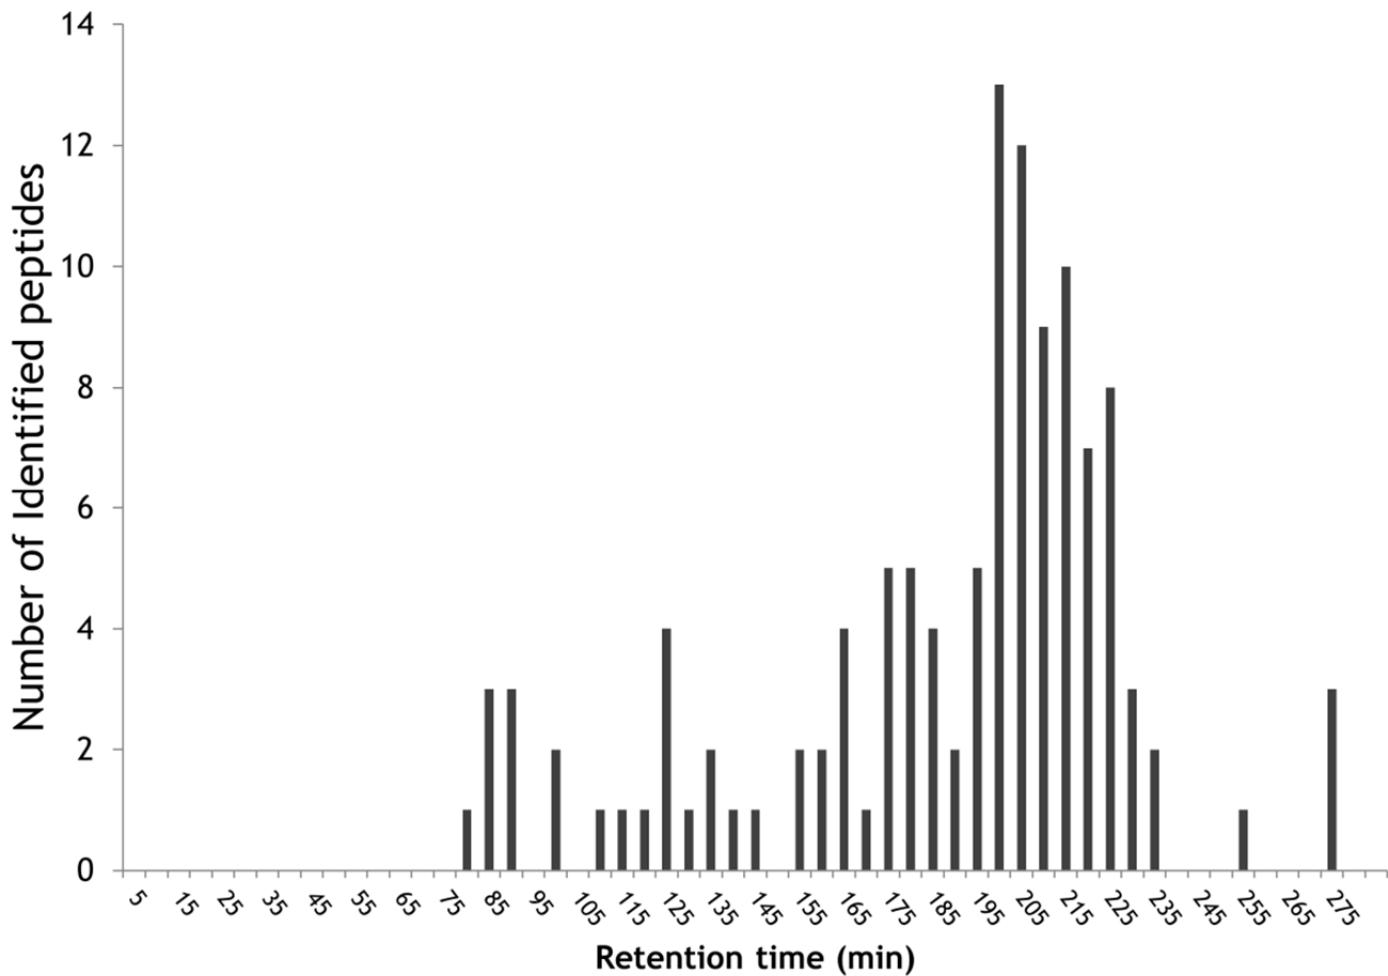

**Supporting Figure 8.** Number of peptides identified uniquely in the unmodified peptide data set sorted by elution time for a tryptic digest of *H. salinarum*.

| Extent of Carbamylation of tryptic BSA peptides measured by (+) nano LC/MS/MS chromatographic peak areas |        |         |              |               |        |         |           |                                 |        |      |
|----------------------------------------------------------------------------------------------------------|--------|---------|--------------|---------------|--------|---------|-----------|---------------------------------|--------|------|
| Singly Carbamylated                                                                                      |        |         |              |               |        |         |           |                                 |        |      |
| Peptide+modification                                                                                     | Charge | m/z     | Peak Area    | Unmodified    | Charge | m/z     | Peak Area | Retention Time (min)            |        |      |
|                                                                                                          |        |         |              |               |        |         |           | <i>shift from carbamylation</i> | %Unmod | %Mod |
| LGEYGFQNALIVR + CARB                                                                                     | 2+     | 761.90  | 654327139    | LGEYGFQNALIVR | 2+     | 740.40  | 5126023   | +16.25                          | <1%    | 99%  |
| DAFLGSFLYEYSR + CARB                                                                                     | 2+     | 805.88  | 904112797    | DAFLGSFLYEYSR | 2+     | 784.37  | 4882691   | +24.01                          | <1%    | 99%  |
| LVVSTQTALA + CARB                                                                                        | 1+     | 1045.59 | 92343433     | LVVSTQTALA    | 1+     | 1002.58 | 216255    | +17.20                          | <1%    | 99%  |
| LVVSTQTALA + CARB                                                                                        | 2+     | 523.29  | 1304867769   | LVVSTQTALA    | 2+     | 501.79  | 4033497   | +17.09                          | <1%    | 99%  |
| Doubly Carbamylated                                                                                      |        |         |              |               |        |         |           |                                 |        |      |
| LVNELTEFAK                                                                                               | 2+     | 582.31  | Not detected |               |        |         |           | Not observed                    |        | 0    |
| LVNELTEFAK + CARB                                                                                        | 2+     | 603.82  | 4496449      |               |        |         |           | 65.93                           |        | 1%   |
| LVNELTEFAK + CARB + CARB(K)                                                                              | 2+     | 625.32  | 333178921    |               |        |         |           | 72.30                           |        | 99%  |
| Triply Carbamylated                                                                                      |        |         |              |               |        |         |           |                                 |        |      |
| LKPDNTLCDEFK                                                                                             | 2+     | 760.37  | 1284970      |               |        |         |           | 42.83                           |        | <1%  |
| LKPDNTLCDEFK + CARB                                                                                      | 2+     | 810.41  | 247578       |               |        |         |           | 48.05                           |        | <1%  |
| LKPDNTLCDEFK + CARB+ CARB(K)                                                                             | 2+     | 831.90  | 10378373     |               |        |         |           | 49.52                           |        | 5%   |
| LKPDNTLCDEFK + CARB+CARB(K)+CARB(K)                                                                      | 2+     | 853.39  | 179823475    |               |        |         |           | 54.3                            |        | 94%  |

**Supporting Table 1.** List of carbamylated BSA peptides and the chromatographic peak areas of the carbamylated peptide and its corresponding unmodified peptide. For the case of multiple (double and triple) modifications, each sequential modification is shown. CARB indicates the peptide modification at the N-terminus, and CARB(K) indicates the modification at the lysine side-chain. %Mod represents the estimated percentage of each peptide that is carbamylated (versus remains unreactive), calculated by dividing the peak area of the carbamylated peptide (from the extracted ion chromatogram) by the summed peak areas of the carbamylated and non-carbamylated peptides.
